# Supplementary material for: Factors influencing the performance of community health volunteers working within urban informal settlements in low- and middle-income countries: a qualitative meta-synthesis review
Source: Springer Nature journal article supplement (doi:10.1186/s12960-021-00691-z), 2021-11-27
Supplement: MOESM2 [file 19906908]

Table of synonyms of key words used in developing the search strategy

| Population 1                            | Population 2        | Population 3                                                                   | Population 4                                                                                                                                                                            | Exposure                      | Outcome 1                                                                                                                                                                                                                                                                                                                                                                                                                                                                                                                                                                                                                                                                  | Outcome 2                                                                                                                                                                                                                                   | Outcome 3                                                                                                                                  | Study                                                                                                                                        |
|-----------------------------------------|---------------------|--------------------------------------------------------------------------------|-----------------------------------------------------------------------------------------------------------------------------------------------------------------------------------------|-------------------------------|----------------------------------------------------------------------------------------------------------------------------------------------------------------------------------------------------------------------------------------------------------------------------------------------------------------------------------------------------------------------------------------------------------------------------------------------------------------------------------------------------------------------------------------------------------------------------------------------------------------------------------------------------------------------------|---------------------------------------------------------------------------------------------------------------------------------------------------------------------------------------------------------------------------------------------|--------------------------------------------------------------------------------------------------------------------------------------------|----------------------------------------------------------------------------------------------------------------------------------------------|
| CHV search terms as outlined in Table 6 | Urban, City, Cities | Informal/ irregular/ illegal slum, settlement/shack/s quarter/ tenement/shanty | Low-and Middle-income countries, LMIC, Low Income Countries, Low Income Country, Middle Income Countries, Middle Income Country, Africa, Asia, developing country, developing countries | CHV programme, CHV programmes | (Intervention, Program characteristics): performance appraisal, personnel selection, personnel recruitment, personnel turnover, staff development, workload, motivation, remuneration, incentives, disincentives, job satisfaction, job performance, retention, supervision, task shifting, quality assurance, continuing education, management quality circles, monitoring and evaluation, medical information system, medical information systems, mobile health, mhealth, ehealth, m-health, e-health, community participation, ownership, empowerment, gender, accountability, village health committees, village health committee, decentralization, decentralisation | (Health system factors): effectiveness, efficiency, equity, health care utilization, patient compliance, patient attitude, patient attitudes, health care quality, patient satisfaction, cost effectiveness analysis, cost benefit analysis | (Broad contextual factors): social, culture, norms, values, practices, beliefs, gender roles, legislation, politics, human resource policy | Qualitative, semi structured, unstructured, informal, in depth, face to face, focus group, key informant, interview, ethnography, narration] |
